# Supplementary material for: One-pot preparation of thin nanoporous copper foils with enhanced light absorption and SERS properties
Source: Royal Society of Chemistry journal article supplement (doi:10.1039/c4ce01967a), 2014-12-09
Supplement: c4ce01967a1.pdf [file c4ce01967a1.pdf]

## Supplementary Information

# One-pot preparation of thin nanoporous copper foils with enhanced light absorption and SERS properties

Ming Li,<sup>a</sup> Yanjie Su,<sup>a</sup> Jiang Zhao,<sup>b</sup> Huijuan Geng,<sup>a</sup> Jing Zhang,<sup>a</sup> Liling Zhang,<sup>a</sup> Chao Yang,<sup>a</sup> and Yafei Zhang<sup>\*a</sup>

<sup>a</sup> Key Laboratory for Thin Film and Microfabrication of the Ministry of Education, Department of Micro/Nano Electronics, School of Electronics, Information and Electrical Engineering, Shanghai Jiao Tong University, Shanghai 200240, PR China.

<sup>b</sup> College of Electronic Science and Engineering, Nanjing University of Posts and Telecommunications, Nanjing 210023, PR China.

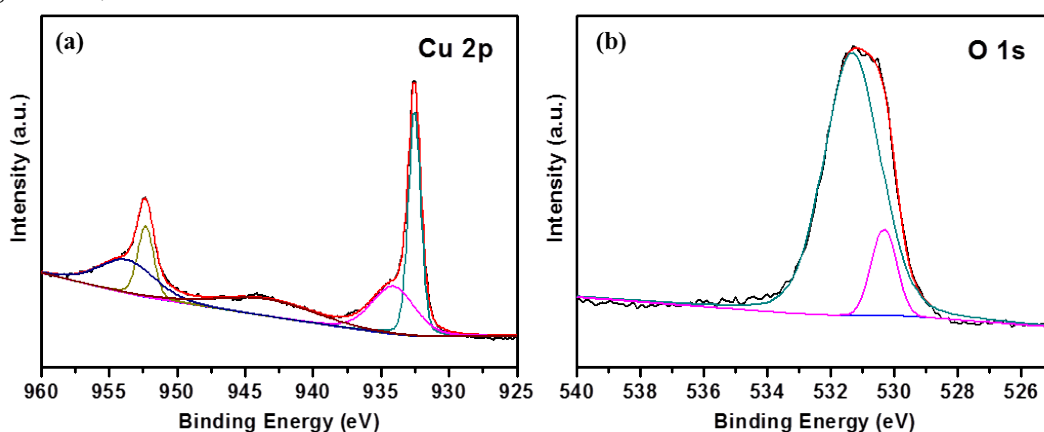

**Fig. S1** XPS spectra of NPCFs: (a) Cu 2p; (b) O 1s. (The NPCFs have been exposed in atmosphere for 3 days)

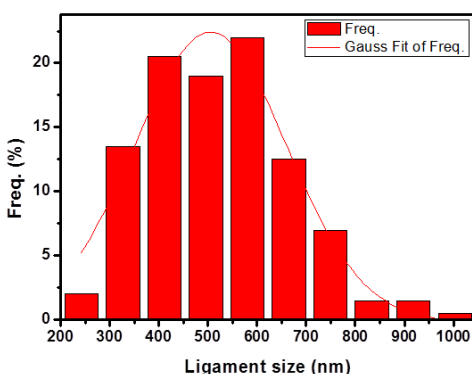

**Fig. S2** Ligament size distribution of NPCFs (for ~200 positions).

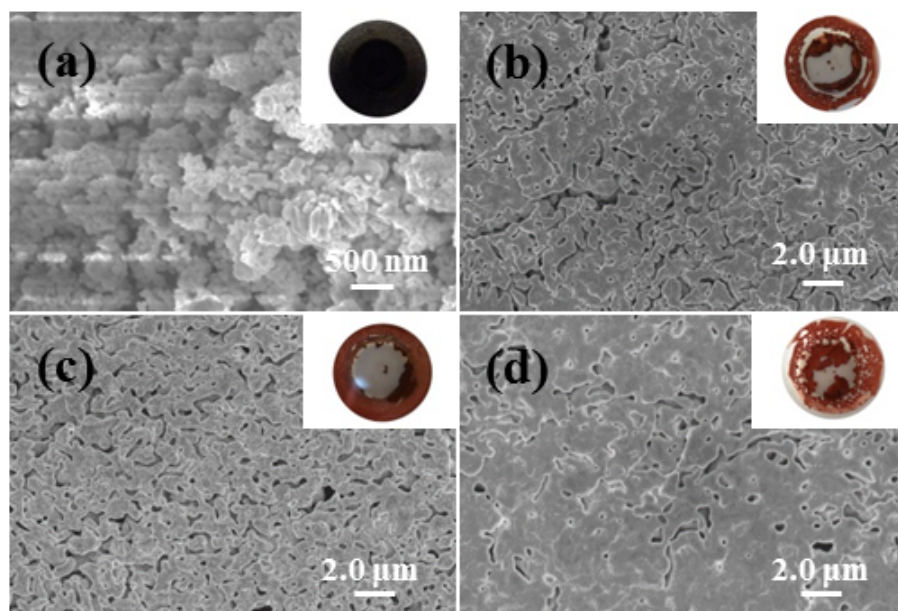

**Fig. S3** SEM images of the samples synthesized at the reaction temperature of (a) 120, (b) 140, (c) 160, and (d) 200 °C. The insets show the corresponding digital images of originally grown samples on the inwall of Teflon autoclave. (The reaction time and amount of EG are 12 h and 5 mL, respectively.)

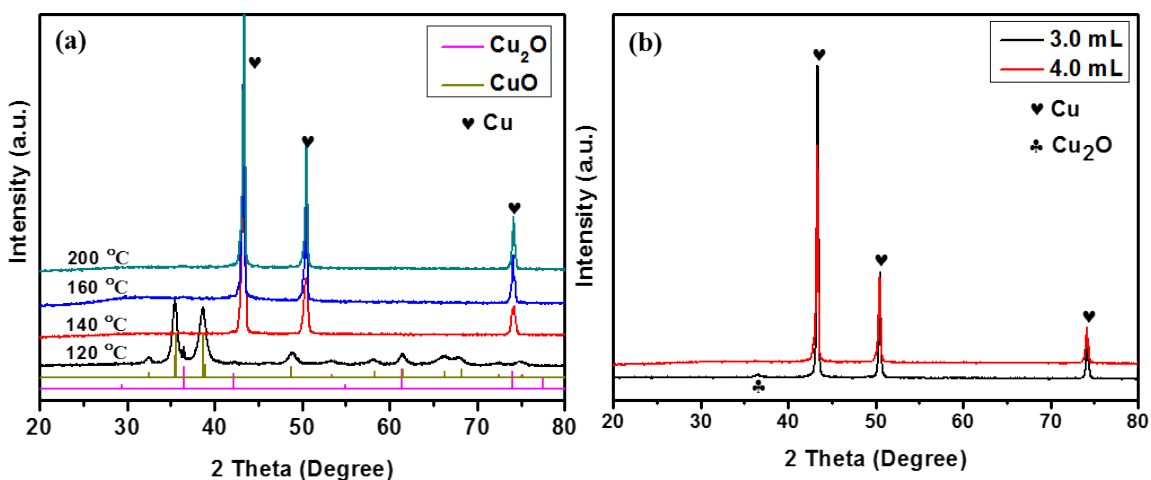

**Fig. S4** XRD patterns of the samples synthesized (a) at different temperatures and (b) amount of EG.

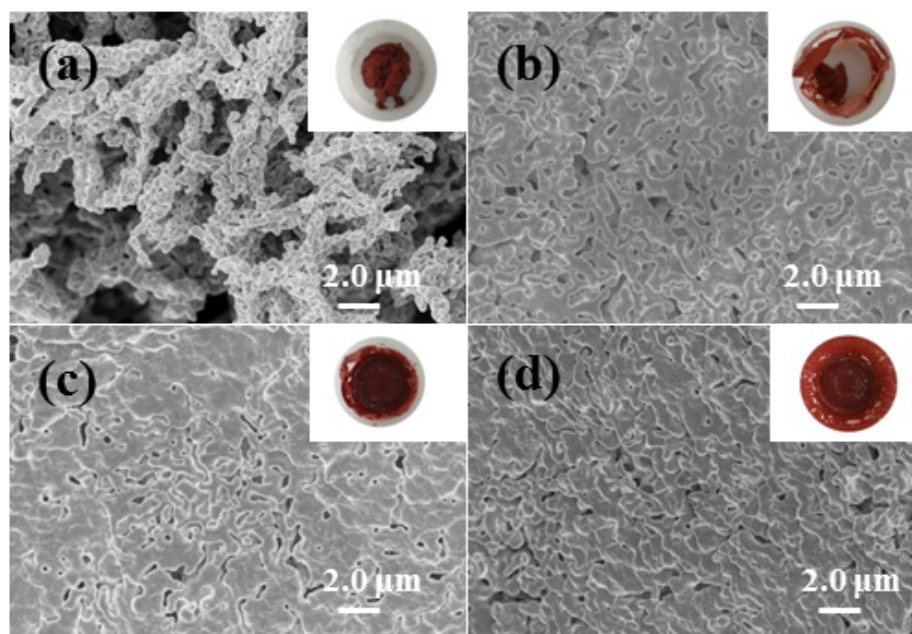

**Fig. S5** SEM images of the synthesized samples with the EG of (a) 3 , (b) 4, (c) 7, (d) 10 mL. The insets show the corresponding digital images of originally grown samples on the inwall of Teflon autoclave (except for (a)). (The reaction temperature and time are 200 °C and 12 h, respectively.)

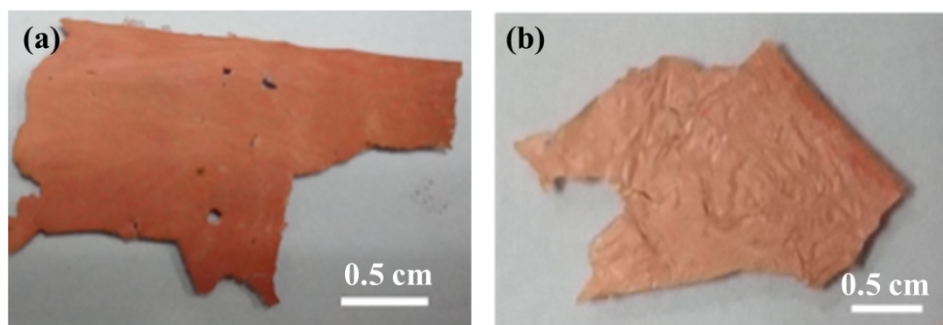

**Fig. S6** Digital images of the (a) rough and (b) smooth sides of NPCFs.

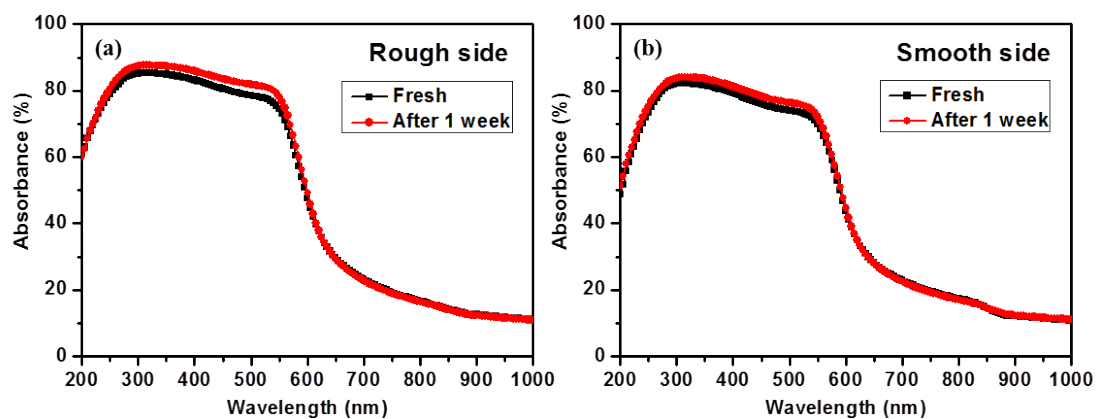

**Fig. S7** UV-vis-NIR absorption spectra of NPCFs before and after being exposed in air for about 1 week: (a) the rough side, (b) the smooth side.

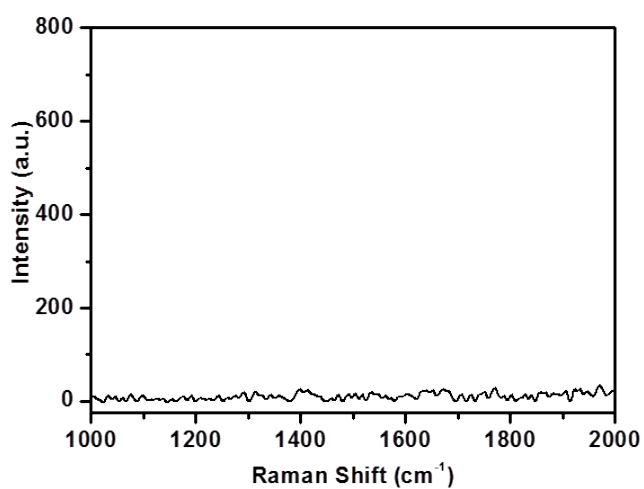

**Fig. S8** Raman spectra of NPCFs substrate.

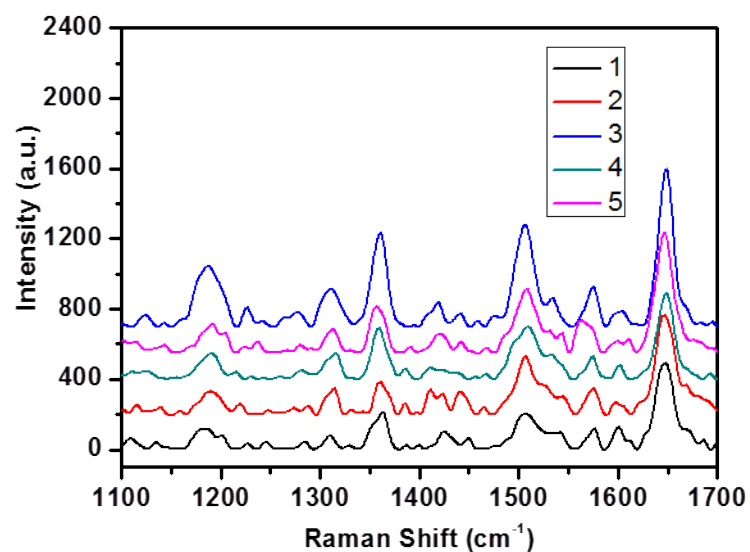

**Fig. S9** SERS spectra of  $10^{-6}$  M R6G for 5 random positions of the smooth side of NPCFs.

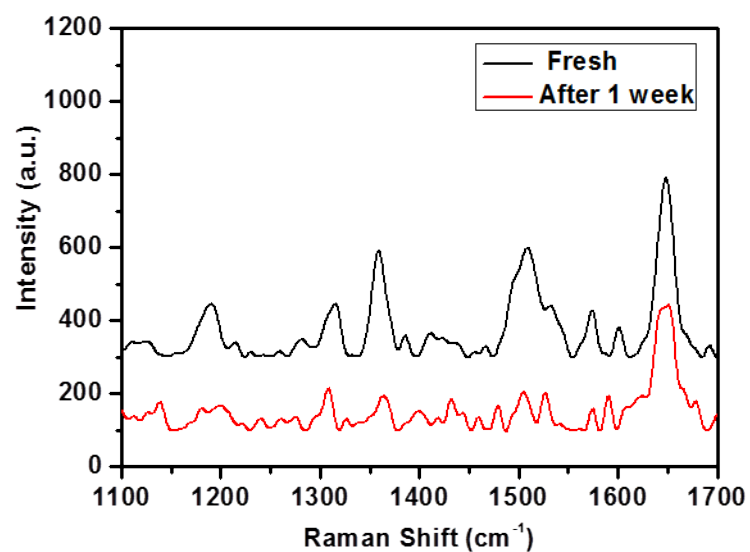

**Fig. S10** The contrastive SERS spectra of  $10^{-6}$  M R6G for the smooth side of NPCFs before and after being exposed in air for about 1 week.
